# Supplementary material for: A Mechanistic Model to Assess the Fate of Naphthalene and Benzo(a)pyrene in a Chilean WWTP
Source: MDPI journal article supplement (doi:10.3390/pr9081313), 2021-07-29
Supplement: s1 [file processes-1263740-supplementary.pdf › processes-1263740-supplementary.pdf]

# **A mechanistic model to assess the fate of PAHs in a Chilean WWTP and implication for effluent reuse and solids disposal**

Antonia Arroyo<sup>1</sup>, Fabián Provoste<sup>1</sup>, Montserrat Rodríguez<sup>1</sup>, and Ana L Prieto<sup>1,2</sup>

Number of pages: 7

Number of tables: 9

1 Departamento de Ingeniería Civil, Universidad de Chile

2 Centro Avanzado Para Tecnologías del Agua (CAPTA) , Universidad de Chile

\* Correspondence to ana.prieto@uchile.cl; Universidad de Chile, Av. Blanco Encalada 2002, 3er Piso, Santiago, Chile.

Table S1. Influent naphthalene loads (g/d) obtained through the bootstrap for the 10%, 50% and 95% probability percentiles

|    | P10   | P50   | P95   |
|----|-------|-------|-------|
| E1 | 170.7 | 397.9 | 715.3 |
| Q1 | 184.1 | 416.9 | 749.5 |
| Q2 | 191.4 | 426.4 | 760.1 |
| Q3 | 201.6 | 434.4 | 773.0 |
| E2 | 221.0 | 454.0 | 795.4 |

Table S2. Influent benzo(a)pyrene loads (g/d) obtained through the bootstrap for the 10%, 50% and 95% probability percentiles

|    | P10  | P50  | P95  |
|----|------|------|------|
| E1 | 4.4  | 24.9 | 82.9 |
| Q1 | 5.6  | 27.3 | 83.6 |
| Q2 | 6.2  | 28.4 | 84.4 |
| Q3 | 9.1  | 32.1 | 84.8 |
| E2 | 10.2 | 33.9 | 86.2 |

## Details About the Mechanistic Model

Table S3. Assumptions for each treatment stage in the PAH model

| Treatment stage           | Compartments                                                 | Processes                                                                                               | Considerations                                                                                                                                                                                                                                                                           | Reference |
|---------------------------|--------------------------------------------------------------|---------------------------------------------------------------------------------------------------------|------------------------------------------------------------------------------------------------------------------------------------------------------------------------------------------------------------------------------------------------------------------------------------------|-----------|
| Primary treatment         | Dissolved and adsorbed to MP                                 | Advection, adsorption, surface volatilization                                                           | Equilibrium between dissolved and sorbed phase. A linear isotherm is used to characterize the process. Sorption occurs onto total suspended solids. Volatilization occurs only to the dissolved phase.                                                                                   | [1]       |
| Secondary treatment       | Dissolved and adsorbed to sludge                             | Advection, adsorption, biodegradation (oxic and anoxic conditions), surface and bubble volatilization   | Equilibrium between dissolved and sorbed phase. Sorption occurs onto total suspended solids. Volatilization occurs only to the dissolved phase. Retransformable fraction is not considered. Biodegradation occurs as cometabolism.                                                       | [1,2]     |
| Thickeners and dewatering | Freely dissolved, sorbed to particles and sorbed to DCM      | Advection                                                                                               | No chemical or biological processes of PAHs take place. No interaction between PAH sorbed to particles and sorbed to DCM.                                                                                                                                                                | [3]       |
| Anaerobic digestion       | Freely dissolved, sorbed to particles, sorbed to DCM and gas | Advection, sorption/desorption to particles, sorption/desorption to DCM, volatilization, biodegradation | Biodegradation occurs as cometabolism to the bioavailable fraction (freely dissolved and sorbed to DCM). Volatilization occurs to the freely dissolved phase. No interaction between PAHs sorbed to particles and sorbed to DCM. Sorption/desorption modelled as a first order reaction. | [4]       |

The general equation for each phase considered in each treatment stage is:

$$0 = r_{adv,i} \pm r_j$$

Where,  $r_{adv,i}$ : Advection rate (Fin – Fout) in the i-phase;  $r_j$ : rate of j-process. The different processes for each treatment stage are presented in Table B2 and B4 for the water line and sludge line, respectively. .

The information regarding operational parameters was obtained from SISS, 2014 [39].

Table S4. Rate equations for the processes considered in the water line

| Treatment stage     | Process                                       | $C_{dis}$ | $C_{ad}$ | Rate                                                            | Reference |
|---------------------|-----------------------------------------------|-----------|----------|-----------------------------------------------------------------|-----------|
| Primary treatment   | Sorption to particles                         | -1        | +1       | $Q \cdot K_{d,prim} \cdot C_{dis} \cdot X$                      | [1]       |
|                     | Superficial volatilization                    | -1        |          | $V \cdot K_L a_{sur} \cdot C_{dis} \frac{H_c}{H_c + (k_L/k_G)}$ |           |
| Secondary treatment | Sorption to particles under aerobic condition | -1        | +1       | $K_{d,ox,sec} \cdot C_{Li} \cdot \frac{S_o}{K_o + S_o} \cdot X$ | [1,2]     |

|  |                                              |    |    |                                                                                                      |  |
|--|----------------------------------------------|----|----|------------------------------------------------------------------------------------------------------|--|
|  | Sorption to particles under anoxic condition | -1 | +1 | $K_{d,Ax,sec} \cdot C_{LI} \cdot \frac{K_o}{K_o + S_o} \cdot X$                                      |  |
|  | Superficial volatilization                   | -1 |    | $V \cdot K_L a_{sur} \cdot C_{dis} \frac{H_c}{H_c + (k_L/k_G)}$                                      |  |
|  | Bubble volatilization                        | -1 |    | $-GH_c C_{dis} \left(1 - \exp \left[-\frac{K_L a_{bub} Z}{H_c U}\right]\right)$                      |  |
|  | Biodegradation in oxic condition             | -1 |    | $\left[q_{C,ox} \cdot \frac{S_s}{K_s + S_s} + k_{Bio,ox}\right] C_{LI} \frac{S_o}{K_o + S_o} X_{SS}$ |  |
|  | Biodegradation in anoxic condition           | -1 |    | $\left[q_{C,Ax} \cdot \frac{S_s}{K_s + S_s} + k_{Bio,ox}\right] C_{LI} \frac{S_o}{K_o + S_o} X_{SS}$ |  |

Table S5. Parameters used in the water line

| Name                                                                                                                      | Parameter           | Unit                | Nap   | B(a)p  | Reference |
|---------------------------------------------------------------------------------------------------------------------------|---------------------|---------------------|-------|--------|-----------|
| Ratio of the liquid-phase mass transfer coefficient to the gas-phase mass transfer coefficient for surface volatilization | $(k_L/k_G)_{sur,p}$ | -                   | 0.025 |        | [1]       |
| Dimensionless Henry's law coefficient                                                                                     | $H_c$               | -                   | 0.03  | 0.0008 | [5]       |
| Linear partition coefficient for primary sludge                                                                           | $K_{d,prim}$        | L/kgSST             | 0.86  | 35.1   | [1]       |
| Overall surface-desorption gas-transfer coefficient                                                                       | $K_L a_{sur,p}$     | d <sup>-1</sup>     | 1.8   |        | [1]       |
| Biotransformation rate                                                                                                    | $k_{bio}$           | L/gSSV*d            | 0.11  | 0.013  | [6]       |
| Solid-liquid sorption coefficient for secondary sludge                                                                    | $K_{d,sec}$         | L/gSST              | 2.2   | 9.7    | [7]       |
| Half saturation coefficient for Ss                                                                                        | $K_s$               | mgCOD/L             | 10    |        | [8]       |
| Half saturation coefficient for dissolved oxygen                                                                          | $K_o$               | mgO <sub>2</sub> /L | 0.2   |        | [8]       |
| Aerobic maximum specific cometabolic substrate biotransformation rate in the presence of growth substrates for CLI        | $q_{c,ox}$          | L/g*d               | 2.4   |        | [2]       |
| Aerobic maximum specific cometabolic substrate biotransformation rate in the presence of growth substrates for CLI        | $q_{c,ax}$          | L/g*d               | 0.96  |        | [2]       |
| Gas flow rate                                                                                                             | $G$                 | m <sup>3</sup> /d   | 47500 |        | [1]       |
| Overall gas-transfer coefficient for bubble desorption                                                                    | $K_L a_{bub}$       | d <sup>-1</sup>     | 64700 |        | [1]       |
| Superficial bubble rising velocity                                                                                        | $U$                 | m/d                 | 7780  |        | [1]       |
| Water column depth                                                                                                        | $Z$                 | m                   | 6     |        | [9]       |

Table S6. Rate equations for the processes considered in the sludge line

| Treatment stage     | Process                                      | C <sub>f</sub> | C <sub>DCM</sub> | C <sub>p</sub> | C <sub>g</sub> | Rate                                                                            | Reference |
|---------------------|----------------------------------------------|----------------|------------------|----------------|----------------|---------------------------------------------------------------------------------|-----------|
| Anaerobic digestion | Volatilization                               | -1             |                  |                | +1             | $K_{La}(K_H \cdot C_f - C_g)$                                                   | [4]       |
|                     | Sorption to particles                        | -1             |                  | +1             |                | $k_1(K_p C_f - c_p)$                                                            |           |
|                     | Sorption to DCM                              | -1             | +1               |                |                | $k_2(K_{DCM} C_f - c_{DCM})$                                                    |           |
|                     | Biodegradation of free dissolved compartment | -1             |                  |                |                | $(T_c \frac{\mu}{Y} + k_c) \left( \frac{C_{free}}{K_{SC} + C_{free}} \right) X$ |           |
|                     | Biodegradation of sorbed to DCM compartment  |                | -1               |                |                | $(T_c \frac{\mu}{Y} + k_c) \left( \frac{C_{DCM}}{K_{SC} + C_{DCM}} \right) X$   |           |

Table S7. Parameters used in the sludge line

| Name                                                                         | Parameter         | Unit                       | Nap    | B(a)p               | Reference |
|------------------------------------------------------------------------------|-------------------|----------------------------|--------|---------------------|-----------|
| Biomass maximum growth rate                                                  | $\mu_{max}$       | d <sup>-1</sup>            | 0.62   |                     | [4]       |
| Half saturation of growth substrate                                          | K <sub>s</sub>    | gCOD/L                     | 5.10   |                     | [4]       |
| Growth yield                                                                 | Y                 | gCOD-X/gCOD-S <sub>s</sub> | 0.75   |                     | [4]       |
| First order endogenous decay                                                 | b                 | d <sup>-1</sup>            | 0.05   |                     | [4]       |
| PAH transformation capacity                                                  | T <sub>c</sub>    | μgPAH/gCOD-S <sub>s</sub>  | 1.90   |                     | [10]      |
| Maximum specific rate of OMPs biodegradation in absence of primary substrate | k <sub>c</sub>    | μgPAH/gCOD-X*d             | 0.27   | 0.06                | [6]       |
| Half saturation constant of PAHs                                             | K <sub>SC</sub>   | μgPAH/L                    | 7,948  | 30,345              | [11]      |
| First order kinetic of hydrolysis                                            | k <sub>hyd</sub>  | d <sup>-1</sup>            | 0.14   |                     | [9]       |
| Overall surface-desorption gas-transfer coefficient                          | K <sub>La</sub>   | d <sup>-1</sup>            | 100    |                     | [12]      |
| Dimensionless Henry's law coefficient                                        | K <sub>H</sub>    | -                          | 0.03   | 0.0007 <sub>9</sub> | [5]       |
| First order kinetic constant of sorption to particles                        | k <sub>1</sub>    | d <sup>-1</sup>            | 0.0067 | 0.015               | [13]      |
| First order kinetic constant of sorption to DCM                              | k <sub>2</sub>    | d <sup>-1</sup>            | 0.0067 | 0.015               | [13]      |
| Equilibrium constant for PAH sorption to particle                            | K <sub>part</sub> | L/gCOD                     | 1.92   | 12.10               | [4]       |
| Equilibrium constant for PAH sorption to DCM                                 | K <sub>DCM</sub>  | L/gCOD                     | 7.98   | 50.35               | [4]       |

## Results for the sensitivity analysis

Table S8. Variations in the PAH load present in the effluent for variations of  $\pm 25\%$ ,  $\pm 50\%$ , and  $\pm 75\%$

| Parameter | Phase | -75% | -50% | -25% | 25%  | 50%  | 75%  |
|-----------|-------|------|------|------|------|------|------|
| Kd, prim  | Fdis  | 1.25 | 1.15 | 1.07 | 0.94 | 0.88 | 0.83 |
|           | Fad   | 0.31 | 0.58 | 0.80 | 1.17 | 1.32 | 1.46 |
|           | Ft    | 1.21 | 1.13 | 1.06 | 0.95 | 0.90 | 0.86 |
| Kd,sec    | Fdis  | 1.25 | 1.15 | 1.07 | 0.94 | 0.88 | 0.83 |
|           | Fad   | 0.31 | 0.58 | 0.80 | 1.17 | 1.32 | 1.46 |
|           | Ft    | 1.21 | 1.13 | 1.06 | 0.95 | 0.90 | 0.86 |
| SRT       | Fdis  | 1.38 | 1.19 | 1.08 | 0.93 | 0.88 | 0.83 |
|           | Fad   | 1.38 | 1.19 | 1.08 | 0.93 | 0.89 | 0.83 |
|           | Ft    | 1.38 | 1.19 | 1.08 | 0.93 | 0.88 | 0.83 |
| k1        | Fdis  | 1.00 | 1.00 | 1.00 | 1.00 | 1.00 | 1.00 |
|           | Fad   | 1.00 | 1.00 | 1.00 | 1.00 | 1.00 | 1.00 |
|           | Ft    | 1.00 | 1.00 | 1.00 | 1.00 | 1.00 | 1.00 |
| kP        | Fdis  | 1.01 | 1.00 | 1.00 | 1.00 | 1.00 | 1.00 |
|           | Fad   | 1.01 | 1.00 | 1.00 | 1.00 | 1.00 | 1.00 |
|           | Ft    | 1.01 | 1.00 | 1.00 | 1.00 | 1.00 | 1.00 |

Table S9. Variations in the PAH load present in the biosolids for variations of  $\pm 25\%$ ,  $\pm 50\%$ , and  $\pm 75\%$

| Parameter | Phase | -75% | -50% | -25% | 25%  | 50%  | 75%  |
|-----------|-------|------|------|------|------|------|------|
| Kd, prim  | Ffree | 0.75 | 0.84 | 0.93 | 1.07 | 1.14 | 1.20 |
|           | FDCM  | 1.01 | 1.01 | 1.00 | 1.00 | 0.99 | 0.99 |
|           | Fp    | 0.72 | 0.82 | 0.92 | 1.08 | 1.15 | 1.21 |
|           | Ft    | 0.75 | 0.84 | 0.92 | 1.07 | 1.13 | 1.19 |
| Kd,sec    | Ffree | 0.70 | 0.82 | 0.91 | 1.09 | 1.16 | 1.20 |
|           | FDCM  | 0.97 | 0.97 | 0.98 | 1.01 | 1.03 | 1.04 |
|           | Fp    | 0.67 | 0.79 | 0.94 | 1.08 | 1.16 | 1.22 |
|           | Ft    | 0.69 | 0.81 | 0.95 | 1.08 | 1.15 | 1.21 |
| SRT       | Ffree | 0.6  | 0.8  | 0.9  | 1.1  | 1.1  | 1.2  |
|           | FDCM  | 1.0  | 1.0  | 1.0  | 1.0  | 1.0  | 1.0  |
|           | Fp    | 0.6  | 0.8  | 0.9  | 1.1  | 1.2  | 1.2  |
|           | Ft    | 0.6  | 0.8  | 0.9  | 1.1  | 1.1  | 1.2  |
| k1        | Ffree | 0.59 | 0.80 | 0.93 | 1.07 | 1.11 | 1.14 |
|           | FDCM  | 0.85 | 0.92 | 0.97 | 1.02 | 1.04 | 1.05 |
|           | Fp    | 1.02 | 1.01 | 1.00 | 0.99 | 0.99 | 0.99 |
|           | Ft    | 1.01 | 1.00 | 1.00 | 1.00 | 1.00 | 1.00 |
| kP        | Ffree | 1.86 | 1.45 | 1.18 | 0.86 | 0.77 | 0.68 |
|           | FDCM  | 1.32 | 1.17 | 1.07 | 0.95 | 0.91 | 0.88 |
|           | Fp    | 0.96 | 0.98 | 0.99 | 1.01 | 1.01 | 1.02 |
|           | Ft    | 0.99 | 0.99 | 1.00 | 1.00 | 1.00 | 1.00 |

## References

1. Lee, K.-C.; Rittmann, B.E.; Shi, J.; McAvoy, D. Advanced steady-state model for the fate of hydrophobic and volatile compounds in activated sludge. *Water Environ. Res.* **1998**, *70*, 1118–1131.
2. Plósz, B.G.; Langford, K.H.; Thomas, K.V. An activated sludge modeling framework for xenobiotic trace chemicals (ASM-X): Assessment of diclofenac and carbamazepine. *Biotechnol. Bioeng.* **2012**, *109*, 2757–2769, doi:10.1002/bit.24553.
3. Barret, M.; Patureau, D.; Latrille, E.; Carrère, H. A three-compartment model for micropollutants sorption in sludge: Methodological approach and insights. *Water Res.* **2010**, *44*, 616–624, doi:10.1016/j.watres.2009.08.029.
4. Delgadillo-Mirquez, L.; Lardon, L.; Steyer, J.-P.; Patureau, D. A new dynamic model for bioavailability and cometabolism of micropollutants during anaerobic digestion. *Water Res.* **2011**, *45*, 4511–4521, doi:10.1016/j.watres.2011.05.047.
5. Fendinger, N.J.; Glotfelty, D.E. Henry's Law constants for selected pesticides, PAHs, and PCBs. *Environmental Toxicology and Chemistry* 1990, Vol 9, 731–735.
6. Bautista, L.F.; Sanz, R.; Molina, M.C.; González, N.; Sánchez, D. Effect of different non-ionic surfactants on the biodegradation of PAHs by diverse aerobic bacteria. *Int. Biodeterior. Biodegradation* **2009**, *63*, 913–922, doi:10.1016/j.ibiod.2009.06.013.
7. Pomiès, M.; Choubert, J.M.; Wisniewski, C.; Coquery, M. Modelling of micropollutant removal in biological wastewater treatments: A review. *Sci Tot Env* 2013, Vol 443, 733–748
8. Plosz, B.; Leknes, H.; Thomas, K.V. Impacts of Competitive Inhibition, Parent Compound Formation and Partitioning Behavior on the Removal of Antibiotics in Municipal Wastewater Treatment. *Environ. Sci. Technol.* **2009**, *44*, 734–742, doi:10.1021/es902264w.
9. Superintendencia de Servicios Sanitarios (SISS). Estudio grandes plantas de tratamiento de aguas servidas Aguas Andinas proceso tarifario 2015–2020. 2014. Available online: <https://infota.siss.cl/concesiones/index.php?dir=empresas%2FAguasAndinas%2F09+Estudio+Tarifario+Intercambio+SISS%2F> (accessed on 24 May 2020).
10. Chang, W.; Criddle, C.S. Experimental Evaluation of a Model for Cometabolism: Prediction of Simultaneous Degradation of Trichloroethylene and Methane by a Methanotrophic Mixed Culture. *Biotechnology and Bioengineering* 1997, Vol 56, 492–501.
11. Dimitriou-Christidis, P.; Autenrieth, R.L.; McDonald, T.J.; Desai, A.M. Measurement of Biodegradability Parameters for Single Unsubstituted and Methylated Polycyclic Aromatic Hydrocarbons in Liquid Bacterial Suspensions. *Biotechnology and Bioengineering* 2006, Vol 97, 922–932. DOI 10.1002/bit
12. Mozo, I.; Bounouba, M.; Mengelle, E.; Lesage, N.; Sperandio, M.; Bessiere, Y. Modelling PAHs removal in activated sludge process: Effect of disintegration. *Water Sci. Technol.* **2019**, *80*, 794–805, doi:10.2166/wst.2019.322.
13. Bezza, F.A.; Nkhalambayausi-Chirwa, E.M. Desorption kinetics of polycyclic aromatic hydrocarbons (PAHs) from contaminated soil and the effect of biosurfactant supplementation on the rapidly desorbing fractions. *Biotechnology & Biotechnological Equipment* 2015, Vol. 29, 680–688. <http://dx.doi.org/10.1080/13102818.2015.1028444>
